# Supplementary material for: Occupational therapy for epidermolysis bullosa: clinical practice guidelines
Source: Springer Nature journal article supplement (doi:10.1186/s13023-019-1059-8), 2019-06-07
Supplement: MOESM1 [file 16781622]

# Occupational Therapy Clinical Practice Guideline: Additional file 1

## Occupational Therapy Evaluation for Epidermolysis Bullosa

### Client Information

|               |  |                 |  |
|---------------|--|-----------------|--|
| Name          |  | Client ID       |  |
| Date of Birth |  | Evaluation Date |  |
| Address       |  | Phone Number    |  |
| Email         |  |                 |  |
| Gender & Sex  |  |                 |  |

### EB/Medical History

|                                     |  |                             |  |
|-------------------------------------|--|-----------------------------|--|
| Type of EB                          |  | Primary Care Provider (PCP) |  |
| Other Known Conditions or Diagnoses |  | PCP Address                 |  |
| Medications                         |  | PCP Phone Number            |  |
| Dressing Materials                  |  |                             |  |
| Insurance/Payer                     |  |                             |  |
| Other Health Care Providers         |  |                             |  |

### Social History

|                     |  |                                        |  |
|---------------------|--|----------------------------------------|--|
| Family in Home      |  | Primary Provider of Assistance in Home |  |
| Relationship Status |  | Type of Home                           |  |
| Sexual Orientation  |  | Stairs In/At Home                      |  |
| Caregiver Roles     |  |                                        |  |
| School              |  |                                        |  |
| Work                |  |                                        |  |
| Emotional Supports  |  |                                        |  |

### Leisure and other Activities

|                              | 1 = Dependent            | 2 = A lot of Help        | 3 = Help with Half       | 4 = A little Help        | 5 = No Help Needed       |
|------------------------------|--------------------------|--------------------------|--------------------------|--------------------------|--------------------------|
| Leisure and other activities | <input type="checkbox"/> | <input type="checkbox"/> | <input type="checkbox"/> | <input type="checkbox"/> | <input type="checkbox"/> |

Comments

|  |  |
|--|--|
|  |  |
|--|--|

# Occupational Therapy Clinical Practice Guideline: Additional file 1

## Self-Care

|                                              | 1 = Dependent            | 2 = A lot of Help        | 3 = Help with Half       | 4 = A little Help        | 5 = No Help Needed       |
|----------------------------------------------|--------------------------|--------------------------|--------------------------|--------------------------|--------------------------|
| <b>Dressing: Lower Body</b>                  | <input type="checkbox"/> | <input type="checkbox"/> | <input type="checkbox"/> | <input type="checkbox"/> | <input type="checkbox"/> |
| Comments                                     |                          |                          |                          |                          |                          |
| <b>Dressing: Upper Body</b>                  | <input type="checkbox"/> | <input type="checkbox"/> | <input type="checkbox"/> | <input type="checkbox"/> | <input type="checkbox"/> |
| Comments                                     |                          |                          |                          |                          |                          |
| <b>Grooming</b> (Hair, Teeth, Shaving, etc.) | <input type="checkbox"/> | <input type="checkbox"/> | <input type="checkbox"/> | <input type="checkbox"/> | <input type="checkbox"/> |
| Comments                                     |                          |                          |                          |                          |                          |
| <b>Eating (Including feeding tube use)</b>   | <input type="checkbox"/> | <input type="checkbox"/> | <input type="checkbox"/> | <input type="checkbox"/> | <input type="checkbox"/> |
| Comments                                     |                          |                          |                          |                          |                          |
| <b>Bathing</b>                               | <input type="checkbox"/> | <input type="checkbox"/> | <input type="checkbox"/> | <input type="checkbox"/> | <input type="checkbox"/> |
| Comments                                     |                          |                          |                          |                          |                          |
| <b>Toileting</b>                             | <input type="checkbox"/> | <input type="checkbox"/> | <input type="checkbox"/> | <input type="checkbox"/> | <input type="checkbox"/> |
| Comments                                     |                          |                          |                          |                          |                          |
| <b>Removing/Applying Dressings/Bandages</b>  | <input type="checkbox"/> | <input type="checkbox"/> | <input type="checkbox"/> | <input type="checkbox"/> | <input type="checkbox"/> |
| Comments                                     |                          |                          |                          |                          |                          |
| <b>Equipment used in home</b>                |                          |                          |                          |                          |                          |
| <b>Equipment used outside of home</b>        |                          |                          |                          |                          |                          |
| <b>Caregivers/Carers</b>                     |                          |                          |                          |                          |                          |

## Mobility

|                                                  | 1 = Dependent            | 2 = A lot of Help        | 3 = Help with Half       | 4 = A little Help        | 5 = No Help Needed       |
|--------------------------------------------------|--------------------------|--------------------------|--------------------------|--------------------------|--------------------------|
| <b>Getting Around in the House</b>               | <input type="checkbox"/> | <input type="checkbox"/> | <input type="checkbox"/> | <input type="checkbox"/> | <input type="checkbox"/> |
| Comments                                         |                          |                          |                          |                          |                          |
| <b>Negotiating Stairs (ascending/descending)</b> | <input type="checkbox"/> | <input type="checkbox"/> | <input type="checkbox"/> | <input type="checkbox"/> | <input type="checkbox"/> |
| Comments                                         |                          |                          |                          |                          |                          |
| <b>Getting Around School/Work</b>                | <input type="checkbox"/> | <input type="checkbox"/> | <input type="checkbox"/> | <input type="checkbox"/> | <input type="checkbox"/> |
| Comments                                         |                          |                          |                          |                          |                          |
| <b>Getting Around Outdoors</b>                   | <input type="checkbox"/> | <input type="checkbox"/> | <input type="checkbox"/> | <input type="checkbox"/> | <input type="checkbox"/> |
| Comments                                         |                          |                          |                          |                          |                          |
| <b>Transportation in the Community</b>           | <input type="checkbox"/> | <input type="checkbox"/> | <input type="checkbox"/> | <input type="checkbox"/> | <input type="checkbox"/> |
| Comments                                         |                          |                          |                          |                          |                          |
| <b>Flying and Distance Travel</b>                | <input type="checkbox"/> | <input type="checkbox"/> | <input type="checkbox"/> | <input type="checkbox"/> | <input type="checkbox"/> |
| Comments                                         |                          |                          |                          |                          |                          |
| <b>Equipment used in home</b>                    |                          |                          |                          |                          |                          |

## Occupational Therapy Clinical Practice Guideline: Additional file 1

|                                       |  |
|---------------------------------------|--|
| <b>Equipment used outside of home</b> |  |
| <b>Caregivers/Carers</b>              |  |

### Sleep

|                                                 |  |
|-------------------------------------------------|--|
| <b>Equipment used in home</b>                   |  |
| <b>Hours per night</b>                          |  |
| <b>Difficulty falling asleep/staying asleep</b> |  |

### Household Management

|                                          | 1 = Dependent            | 2 = A lot of Help        | 3 = Help with Half       | 4 = A little Help        | 5 = No Help Needed       |
|------------------------------------------|--------------------------|--------------------------|--------------------------|--------------------------|--------------------------|
| <b>Cleaning the Home</b>                 | <input type="checkbox"/> | <input type="checkbox"/> | <input type="checkbox"/> | <input type="checkbox"/> | <input type="checkbox"/> |
| <i>Comments</i>                          |                          |                          |                          |                          |                          |
| <b>Cooking/Meal Preparation</b>          | <input type="checkbox"/> | <input type="checkbox"/> | <input type="checkbox"/> | <input type="checkbox"/> | <input type="checkbox"/> |
| <i>Comments</i>                          |                          |                          |                          |                          |                          |
| <b>Laundry</b>                           | <input type="checkbox"/> | <input type="checkbox"/> | <input type="checkbox"/> | <input type="checkbox"/> | <input type="checkbox"/> |
| <i>Comments</i>                          |                          |                          |                          |                          |                          |
| <b>Opening Containers</b>                | <input type="checkbox"/> | <input type="checkbox"/> | <input type="checkbox"/> | <input type="checkbox"/> | <input type="checkbox"/> |
| <i>Comments</i>                          |                          |                          |                          |                          |                          |
| <b>Paying Bills/Managing Expenses</b>    | <input type="checkbox"/> | <input type="checkbox"/> | <input type="checkbox"/> | <input type="checkbox"/> | <input type="checkbox"/> |
| <i>Comments</i>                          |                          |                          |                          |                          |                          |
| <b>Environmental Controls/Appliances</b> | <input type="checkbox"/> | <input type="checkbox"/> | <input type="checkbox"/> | <input type="checkbox"/> | <input type="checkbox"/> |
| <i>Comments</i>                          |                          |                          |                          |                          |                          |
| <b>Equipment used in home</b>            |                          |                          |                          |                          |                          |
| <b>Caregivers/Carers</b>                 |                          |                          |                          |                          |                          |

### Work/School

|                                          | 1 = Dependent            | 2 = A lot of Help        | 3 = Help with Half       | 4 = A little Help        | 5 = No Help Needed       |
|------------------------------------------|--------------------------|--------------------------|--------------------------|--------------------------|--------------------------|
| <b>Writing</b>                           | <input type="checkbox"/> | <input type="checkbox"/> | <input type="checkbox"/> | <input type="checkbox"/> | <input type="checkbox"/> |
| <i>Comments</i>                          |                          |                          |                          |                          |                          |
| <b>Typing</b>                            | <input type="checkbox"/> | <input type="checkbox"/> | <input type="checkbox"/> | <input type="checkbox"/> | <input type="checkbox"/> |
| <i>Comments</i>                          |                          |                          |                          |                          |                          |
| <b>Reading</b>                           | <input type="checkbox"/> | <input type="checkbox"/> | <input type="checkbox"/> | <input type="checkbox"/> | <input type="checkbox"/> |
| <i>Comments</i>                          |                          |                          |                          |                          |                          |
| <b>Working in Groups</b>                 | <input type="checkbox"/> | <input type="checkbox"/> | <input type="checkbox"/> | <input type="checkbox"/> | <input type="checkbox"/> |
| <i>Comments</i>                          |                          |                          |                          |                          |                          |
| <b>Social/Professional Relationships</b> | <input type="checkbox"/> | <input type="checkbox"/> | <input type="checkbox"/> | <input type="checkbox"/> | <input type="checkbox"/> |

## Occupational Therapy Clinical Practice Guideline: Additional file 1

|                                            |                          |                          |                          |                          |                          |
|--------------------------------------------|--------------------------|--------------------------|--------------------------|--------------------------|--------------------------|
| Comments                                   |                          |                          |                          |                          |                          |
| <b>Participation in Physical Education</b> | <input type="checkbox"/> | <input type="checkbox"/> | <input type="checkbox"/> | <input type="checkbox"/> | <input type="checkbox"/> |
| Comments                                   |                          |                          |                          |                          |                          |
| <b>Adaptation/Modification Management</b>  | <input type="checkbox"/> | <input type="checkbox"/> | <input type="checkbox"/> | <input type="checkbox"/> | <input type="checkbox"/> |
| Comments                                   |                          |                          |                          |                          |                          |
| <b>Equipment used in school/work</b>       |                          |                          |                          |                          |                          |
| <b>Adaptations/Modifications</b>           |                          |                          |                          |                          |                          |
| <b>Caregivers/Carers</b>                   |                          |                          |                          |                          |                          |

### Hand/Skin Assessment

|                                                                       |                                                                                                                                                                                                                                                                                                            |                                                                                                                                                                                                                                                                                                            |
|-----------------------------------------------------------------------|------------------------------------------------------------------------------------------------------------------------------------------------------------------------------------------------------------------------------------------------------------------------------------------------------------|------------------------------------------------------------------------------------------------------------------------------------------------------------------------------------------------------------------------------------------------------------------------------------------------------------|
| <b>Hand Dominance</b>                                                 |                                                                                                                                                                                                                                                                                                            |                                                                                                                                                                                                                                                                                                            |
| <b>Open or Blistered Areas</b>                                        |                                                                                                                                                                                                                                                                                                            |                                                                                                                                                                                                                                                                                                            |
| <b>Nature of Contractures</b>                                         | (Flexion vs. Cocooning vs Web Space)                                                                                                                                                                                                                                                                       |                                                                                                                                                                                                                                                                                                            |
| <b>Gross Grasp</b>                                                    | Percentage remaining: Left _____%, Right _____%                                                                                                                                                                                                                                                            |                                                                                                                                                                                                                                                                                                            |
| <b>Precision Pinches<br/>(If limited, indicate level of function)</b> | <u>Left</u>                                                                                                                                                                                                                                                                                                | <u>Right</u>                                                                                                                                                                                                                                                                                               |
|                                                                       | Lateral Pinch – Full Function <input type="checkbox"/> , Limited <input type="checkbox"/> _____%<br>2-Finger Pinch – Full Function <input type="checkbox"/> , Limited <input type="checkbox"/> _____%<br>3-Finger Pinch – Full Function <input type="checkbox"/> , Limited <input type="checkbox"/> _____% | Lateral Pinch – Full Function <input type="checkbox"/> , Limited <input type="checkbox"/> _____%<br>2-Finger Pinch – Full Function <input type="checkbox"/> , Limited <input type="checkbox"/> _____%<br>3-Finger Pinch – Full Function <input type="checkbox"/> , Limited <input type="checkbox"/> _____% |
| <b>Functional Digital Use</b>                                         | Task                                                                                                                                                                                                                                                                                                       | Pinch Utilized<br>(Lateral, Pincer, 3-Jaw, Bimanual, Other)                                                                                                                                                                                                                                                |
|                                                                       | Turning Key                                                                                                                                                                                                                                                                                                | Level of Independence<br>(Independent, Modified – Uses equipment or adaptation, Dependent – Requires assistance)                                                                                                                                                                                           |
|                                                                       | Picking Up a Coin                                                                                                                                                                                                                                                                                          |                                                                                                                                                                                                                                                                                                            |
|                                                                       | Grasping a Pencil                                                                                                                                                                                                                                                                                          |                                                                                                                                                                                                                                                                                                            |
|                                                                       | Finger Feeding                                                                                                                                                                                                                                                                                             |                                                                                                                                                                                                                                                                                                            |
|                                                                       | Fork/Spoon Use                                                                                                                                                                                                                                                                                             |                                                                                                                                                                                                                                                                                                            |
|                                                                       | Knife Use                                                                                                                                                                                                                                                                                                  |                                                                                                                                                                                                                                                                                                            |
|                                                                       | Holding a Cup                                                                                                                                                                                                                                                                                              |                                                                                                                                                                                                                                                                                                            |
|                                                                       | Using Scissors                                                                                                                                                                                                                                                                                             |                                                                                                                                                                                                                                                                                                            |
|                                                                       | Grasping Shoe String                                                                                                                                                                                                                                                                                       |                                                                                                                                                                                                                                                                                                            |
|                                                                       | Other (Indicate task):                                                                                                                                                                                                                                                                                     |                                                                                                                                                                                                                                                                                                            |

# Occupational Therapy Clinical Practice Guideline: Additional file 1

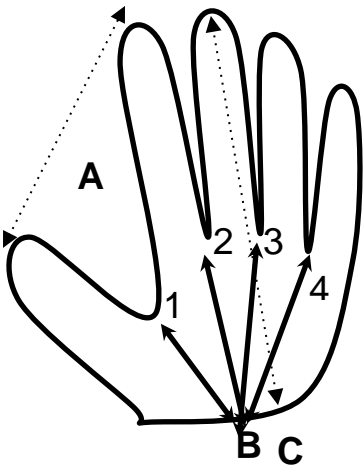

- Draw an imaginary line connecting the ulnar styloid and radial head.
- B-Web spaces are measured from the imaginary line ~~between~~ at the wrist to the end of the web spaces.
- The length of the middle finger is measured. (C )
- Monitor web creep by comparing the change in long finger length with web length to account for normal growth.

Reference: Lipnick et al (1992) Physical rehabilitation of epidermolysis bullosa patients; Epidermolysis bullosa: Basic and clinical aspects. Weiss and Prinz (2013) also describe a method of web space measurement. In addition, various clinicians that work with persons with EB have developed, but not published, alternative methods.

|                                         | Left                                                                                                                                  | Right |   |   |   |  |  |  |  |                                                                                                                                       |   |   |   |   |  |  |  |  |
|-----------------------------------------|---------------------------------------------------------------------------------------------------------------------------------------|-------|---|---|---|--|--|--|--|---------------------------------------------------------------------------------------------------------------------------------------|---|---|---|---|--|--|--|--|
| <b>A. First web opening</b>             |                                                                                                                                       |       |   |   |   |  |  |  |  |                                                                                                                                       |   |   |   |   |  |  |  |  |
| <b>B. Wrist to web</b>                  | <table border="1"> <tr> <td>1</td> <td>2</td> <td>3</td> <td>4</td> </tr> <tr> <td></td> <td></td> <td></td> <td></td> </tr> </table> | 1     | 2 | 3 | 4 |  |  |  |  | <table border="1"> <tr> <td>1</td> <td>2</td> <td>3</td> <td>4</td> </tr> <tr> <td></td> <td></td> <td></td> <td></td> </tr> </table> | 1 | 2 | 3 | 4 |  |  |  |  |
| 1                                       | 2                                                                                                                                     | 3     | 4 |   |   |  |  |  |  |                                                                                                                                       |   |   |   |   |  |  |  |  |
|                                         |                                                                                                                                       |       |   |   |   |  |  |  |  |                                                                                                                                       |   |   |   |   |  |  |  |  |
| 1                                       | 2                                                                                                                                     | 3     | 4 |   |   |  |  |  |  |                                                                                                                                       |   |   |   |   |  |  |  |  |
|                                         |                                                                                                                                       |       |   |   |   |  |  |  |  |                                                                                                                                       |   |   |   |   |  |  |  |  |
| <b>C. Wrist to tip of middle finger</b> |                                                                                                                                       |       |   |   |   |  |  |  |  |                                                                                                                                       |   |   |   |   |  |  |  |  |

## Evaluation Summary

ADDITIONAL COMMENTS

GOALS

(as agreed upon by client and team)

FOLLOW UP/PLAN OF CARE
