# Supplementary material for: Occupational therapy for epidermolysis bullosa: clinical practice guidelines
Source: Springer Nature journal article supplement (doi:10.1186/s13023-019-1059-8), 2019-06-07
Supplement: MOESM2 [file 16781622]

## Occupational Therapy Guideline: Additional file 2

| A. Assessment form                                                                      | Validated for the EB population      | Age range               |                                   |                           | Benefits                                                                                                                              | Limitations                                                                                          |
|-----------------------------------------------------------------------------------------|--------------------------------------|-------------------------|-----------------------------------|---------------------------|---------------------------------------------------------------------------------------------------------------------------------------|------------------------------------------------------------------------------------------------------|
|                                                                                         |                                      | Infant<br>(0-12 months) | Child<br>(1 year - pre-pubescent) | Adult<br>(post-pubescent) |                                                                                                                                       |                                                                                                      |
| <b>Quality of Life Evaluation in Epidermolysis Bullosa (QOLEB)<sup>16</sup></b>         | <b>Validated on patients with EB</b> | No                      | Yes                               | Yes                       | Useful for all EB subtypes                                                                                                            | Children under 10 may need caregiver assistance to complete                                          |
| <b>Child Occupational Self-Assessment (COSA)<sup>29</sup></b>                           | Not validated on patients with EB    | No                      | 6-17 years                        | No                        | A self-report of occupational competence and value for everyday activities that uses visual cues for rating                           | Can be used for younger children depending on their maturity or with caregiver assistance as needed. |
| <b>COSA adapted for persons with EB<sup>30</sup></b>                                    |                                      |                         |                                   |                           | a modified version for children with EB                                                                                               |                                                                                                      |
| <b>Pediatric Reported Outcomes Measurement Information System (PROMIS)<sup>31</sup></b> | Not validated on patients with EB    | No                      | 8-17 years                        | Yes                       | An NIH supported group of self-report scales that include upper extremity skills and activities of daily living that can be web-based | Developed in English and research of validity and reliability performed in the United States         |
| <b>Functional Independence Measure for</b>                                              | Not validated on patients with EB    | Yes                     | Yes                               | No                        | An assessment using observation and interview on 18                                                                                   | More difficult to rate younger children 2-4 years                                                    |

## Occupational Therapy Guideline: Additional file 2

|                                                          |                                   |     |           |    |                                                                                                                                                                     |                                                                                   |
|----------------------------------------------------------|-----------------------------------|-----|-----------|----|---------------------------------------------------------------------------------------------------------------------------------------------------------------------|-----------------------------------------------------------------------------------|
| <b>Children (WeeFim)<sup>32</sup></b>                    |                                   |     |           |    | items to measure functional performance in self-care, mobility, and cognition.                                                                                      |                                                                                   |
| <b>Hawaii Early Learning Profile (HELP)<sup>33</sup></b> | Not validated on patients with EB | Yes | 0-6 years | No | A checklist designed to assess function in 6 areas of development including fine and gross motor skills and adaptive/self-help areas<br>Translated into 8 languages | No peer-reviewed publications evaluating the reliability or validity were located |

## Occupational Therapy Guideline: Additional file 2

| B. Standardized assessments of fine motor skill                 | Validated for the EB population      | Age range               |                                   |                           | Benefits                                                                                                                                         | Limitations                                                                                                                                                                                       |
|-----------------------------------------------------------------|--------------------------------------|-------------------------|-----------------------------------|---------------------------|--------------------------------------------------------------------------------------------------------------------------------------------------|---------------------------------------------------------------------------------------------------------------------------------------------------------------------------------------------------|
|                                                                 |                                      | Infant<br>(0-12 months) | Child<br>(1 year - pre-pubescent) | Adult<br>(post-pubescent) |                                                                                                                                                  |                                                                                                                                                                                                   |
| <b>Iscor EB</b> <sup>24</sup>                                   | <b>Validated in children with EB</b> | No                      | 1-17 years                        | 18- 50 years              | A questionnaire developed for persons with EB includes use of hands as an outcome in their assessment <sup>24</sup>                              | There is a more recent reference for the Iscor EB <sup>25</sup> , published in 2018 that was not appraised as publication occurred after appraisal process for OT CPG was completed <sup>25</sup> |
| <b>Abilhand-Kid</b> <sup>22</sup>                               | <b>Validated in children with EB</b> | No                      | 6-15 years                        | No                        | A questionnaire assessing manual dexterity, upper extremity function and various ADL functions                                                   | Based on patient and caregiver perceived difficulties                                                                                                                                             |
| <b>Abilhand-adults</b> <sup>37</sup>                            | Not validated on patients with EB    | No                      | No                                | 16 -80 years              |                                                                                                                                                  |                                                                                                                                                                                                   |
| <b>Patient Reported Outcomes Measure (PROMIS)</b> <sup>38</sup> | Not validated on patients with EB    | No                      | Adolescent to young adult         | Yes                       | An NIH supported group of self-report scales that include upper extremity skills and activities of daily living that can be web-based for adults | Validity and reliability studies on young adults                                                                                                                                                  |

## Occupational Therapy Guideline: Additional file 2

|                                                               |                                   |     |                 |    |                                                                                                                                                                          |                                                                     |
|---------------------------------------------------------------|-----------------------------------|-----|-----------------|----|--------------------------------------------------------------------------------------------------------------------------------------------------------------------------|---------------------------------------------------------------------|
| <b>Sensory Profile (SP)<sup>39</sup></b>                      | Not validated on patients with EB | No  | 5-10 years      | No | A group of questionnaires with three main sections; sensory processing modulation, and behavioural and emotional responses                                               | used primarily by English speaking countries                        |
| <b>Sensory Processing Measure (SPM)<sup>39</sup></b>          | Not validated on patients with EB | No  | 5-12 years      | No | A questionnaire to be filled out by caregivers, main classroom teacher, and other school personnel assessing social participation, praxis, and sensory processing issues | Used primarily by English speaking countries                        |
| <b>Peabody Developmental Motor Scales (PDMS)<sup>40</sup></b> | Not validated on patients with EB | Yes | Birth-71 months | No | Fine motor subtests provide objective information to supplement the entire evaluation and support the need for therapy services                                          | May not be sensitive enough to detect deficits with mild impairment |

**References** here and not from the main body of text

37. Simone A, Roja V, Tesio L, Perucca L. Generic ABILHAND questionnaire can measure manual ability across a variety of motor impairments. *Int J Rehabil Res.* 2011;34:131-140.

38. Howell C, Gross H, Reeve B, DeWalt D, Huang I. Known-groups validity of the Patient-Reported Outcomes Measurement Information System (PROMIS) in adolescents and young adults with special healthcare needs. *Qual Life Res.* 2016;25:1815-1823.

## **Occupational Therapy Guideline: Additional file 2**

39. Brown T, Morrison I, Stagnitti K. The convergent validity of two sensory processing scales used with school-age children: Comparing the Sensory Profile and the Sensory Processing Measure. *N Z J Occup Ther.* 2010;57:56-65.
40. Van Hartingsveldt MJ, Cup EH, Oostendorp RA. Reliability and validity of the fine motor scale of the Peabody Developmental Motor Scales–2. *Occup Ther Int.* 2005;12:1–13.
