# Supplementary material for: Occupational therapy for epidermolysis bullosa: clinical practice guidelines
Source: Springer Nature journal article supplement (doi:10.1186/s13023-019-1059-8), 2019-06-07
Supplement: MOESM5 [file 16781622]

## Occupational Therapy Guideline: Additional file 5

### Hand and Wrist Exercises.

| Type of exercise                                                                    | Instruction and how many repeats                                         | How often per week |
|-------------------------------------------------------------------------------------|--------------------------------------------------------------------------|--------------------|
| <b>With no tools</b>                                                                |                                                                          |                    |
|    | Hold for 20-30 seconds and then repeat.                                  | To be done daily.  |
|   | Stretch from the base of the thumb and hold for 20-30 seconds and repeat | To be done daily.  |
|  | Hold for 20-30 seconds and repeat.                                       | To be done daily.  |

**Figure 1:** Wrist extension stretch.

**Figure 2:** First web space stretch.

**Figure 3:** Interdigital finger stretching.

| Type of exercise                                                                                                                                                                                                                                                                                    | Instruction and how many repeats                                                                                                                                                                                                                                                       | How often per week                                                                                            |
|-----------------------------------------------------------------------------------------------------------------------------------------------------------------------------------------------------------------------------------------------------------------------------------------------------|----------------------------------------------------------------------------------------------------------------------------------------------------------------------------------------------------------------------------------------------------------------------------------------|---------------------------------------------------------------------------------------------------------------|
| <b>With tools</b>                                                                                                                                                                                                                                                                                   |                                                                                                                                                                                                                                                                                        |                                                                                                               |
| 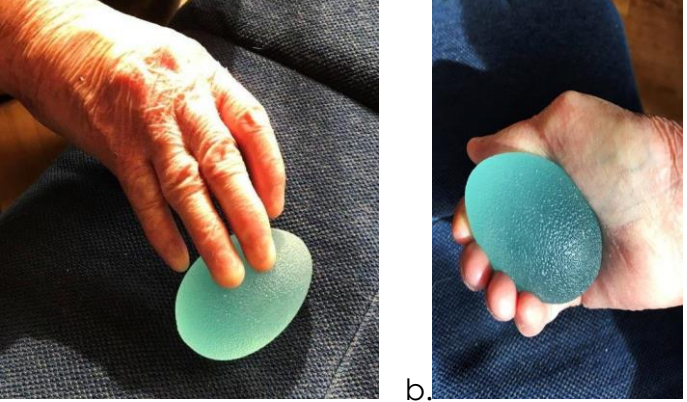 <p data-bbox="203 766 235 787">a.</p> <p data-bbox="633 766 665 787">b.</p> <p data-bbox="203 829 787 871"><b>Figure 4:</b> Hand exercises using a gel egg.</p>                                                   | <p data-bbox="982 357 1201 598">Roll the egg with fingers back and forth to stretch fingers into extension 10 times slowly</p> <p data-bbox="982 640 1201 955">Grasp egg to gently stretch fingers and thumb open. Also stretch the base of the thumb. Hold for up to 1-2 minutes.</p> | <p data-bbox="1226 357 1404 430">To be done daily.</p> <p data-bbox="1226 640 1404 714">To be done daily.</p> |
|  <p data-bbox="251 1344 284 1365">a.</p> <p data-bbox="625 1344 657 1365">b.</p> <p data-bbox="203 1407 925 1480"><b>Figure 5:</b> Finger and wrist exercises using a padded handle against light resistance.</p> | <p data-bbox="982 966 1201 1207">Grasp handle and pull gently to stretch fingers into extension. Hold for a count of 10.</p>                                                                                                                                                           | <p data-bbox="1226 966 1404 1039">To be done daily.</p>                                                       |

| Type of exercise                                                                                       | Instruction and how many repeats                                                                                                                                                                                                                                                  | How often per week                                                                                                                                              |
|--------------------------------------------------------------------------------------------------------|-----------------------------------------------------------------------------------------------------------------------------------------------------------------------------------------------------------------------------------------------------------------------------------|-----------------------------------------------------------------------------------------------------------------------------------------------------------------|
|  <p>a.</p> <p>b.</p> | <p>Gently grasp the ball, keeping the palm in contact with the surface. Use the ball to gently stretch the base of the thumb open. Hold for a slow count of 10, repeat.</p> <p>Grasp and/or pinch the ball with fingers and thumb to maintain hand strength. Repeat 10 times.</p> | <p>This can be alternated with the stretch on the knee or the egg exercise above.</p> <p>To be done 3-5 times per week if it does not cause skin breakdown.</p> |

**Figure 6:** Hand exercise using a light, pliable ball for first web-space stretch and pinch strengthening.

| Product                                | Geographical location | Estimated cost in US\$             |
|----------------------------------------|-----------------------|------------------------------------|
| Gel Egg                                | Norway, US, Mexico    | 6.00-9.00                          |
| Padded handle against light resistance | Norway, US, Mexico    | 2.00-6.00 to make, 12-15.00 to buy |
| Pliable ball                           | Norway, US, Mexico    | 8.00-12.00                         |

For additional examples, resources and suggestions, please refer to Occupational Therapy in Epidermolysis Bullosa by Weiß and Prinz (2013).
