# Supplementary material for: Occupational therapy for epidermolysis bullosa: clinical practice guidelines
Source: Springer Nature journal article supplement (doi:10.1186/s13023-019-1059-8), 2019-06-07
Supplement: MOESM6 [file 16781622]

Orthoses

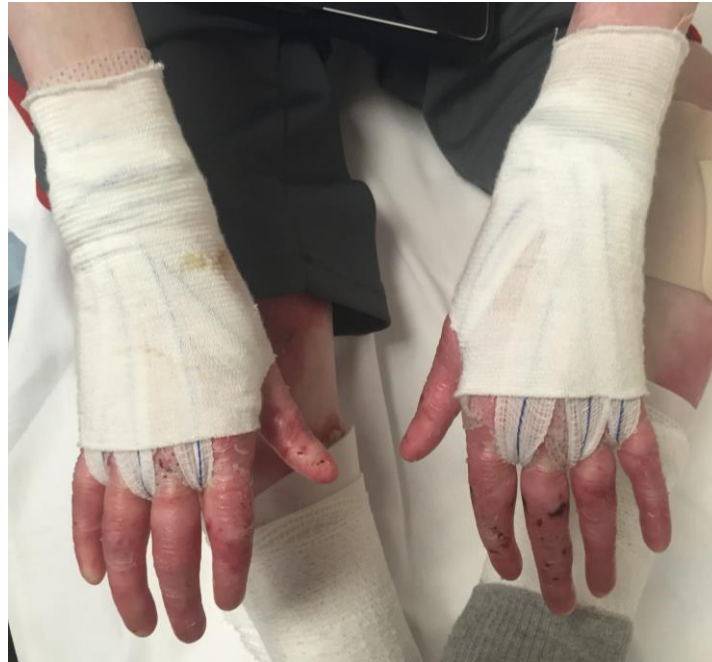

**Figure 1:** Interdigital finger wrapping

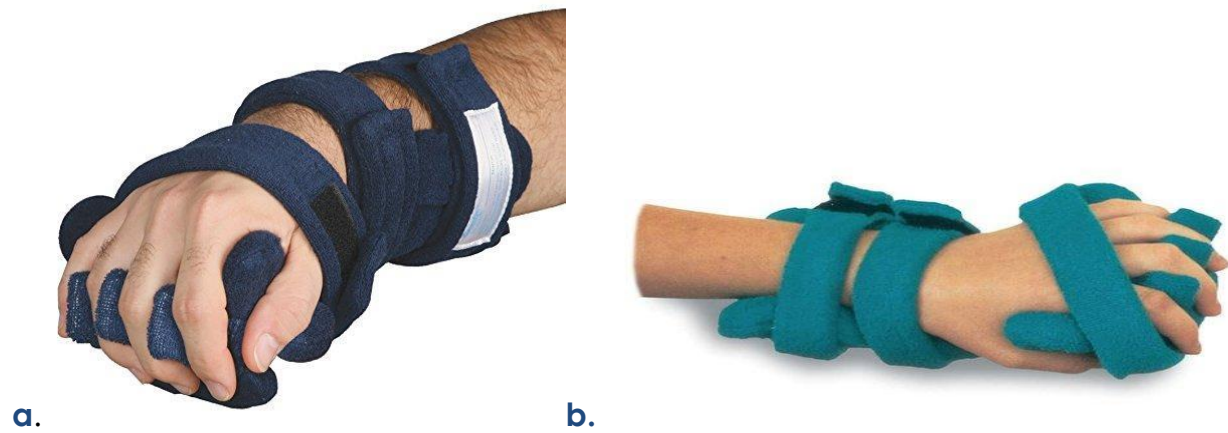

**Figure 2:** Soft wrist and finger orthosis for **a.** night use **b.** shorter version

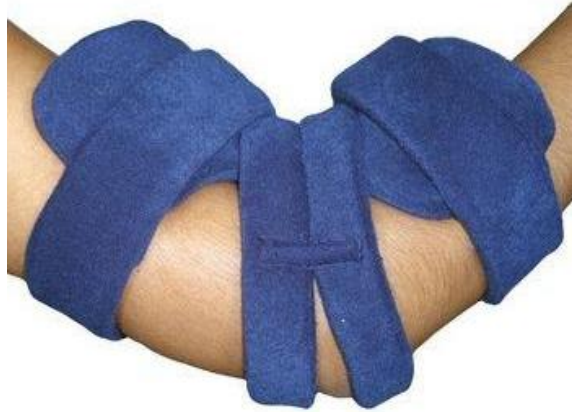

**Figure 3:** Soft elbow orthosis to maintain elbow extension

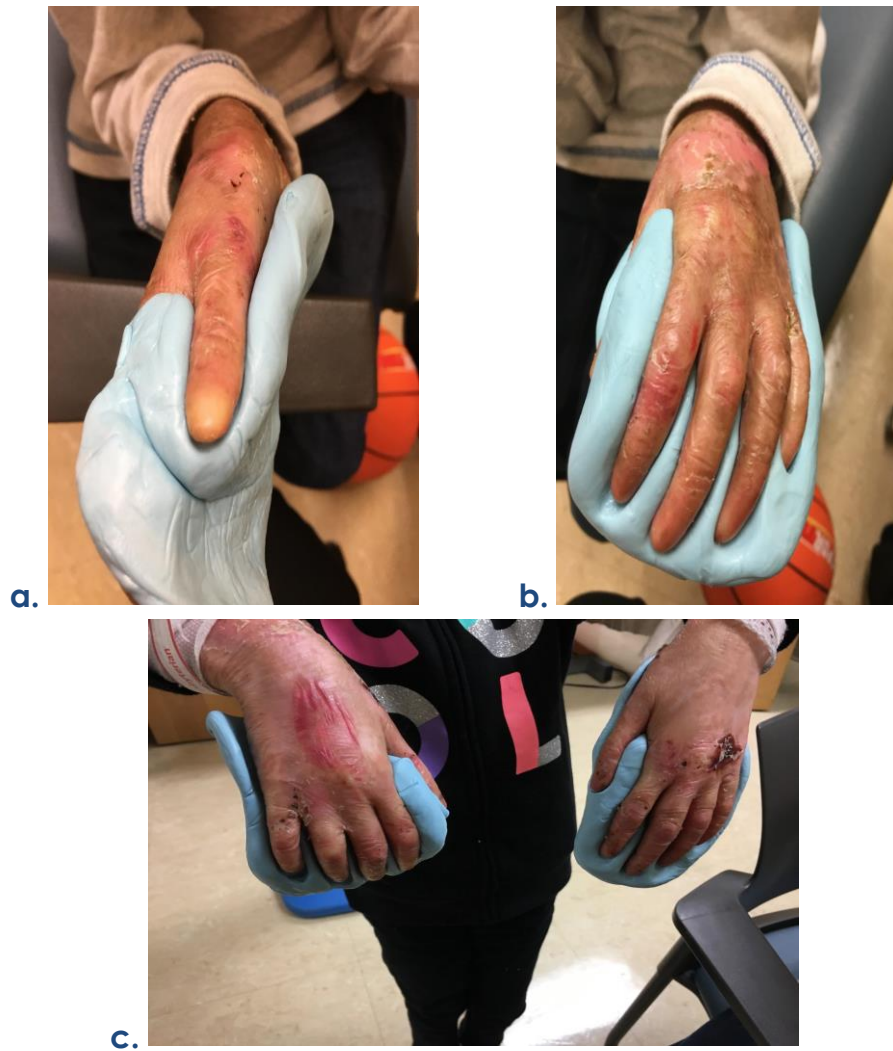

**Figure 4:** Elastomer (silicone putty) **a.** palmar view; **b.** dorsal view; **c.** to prevent further web creep

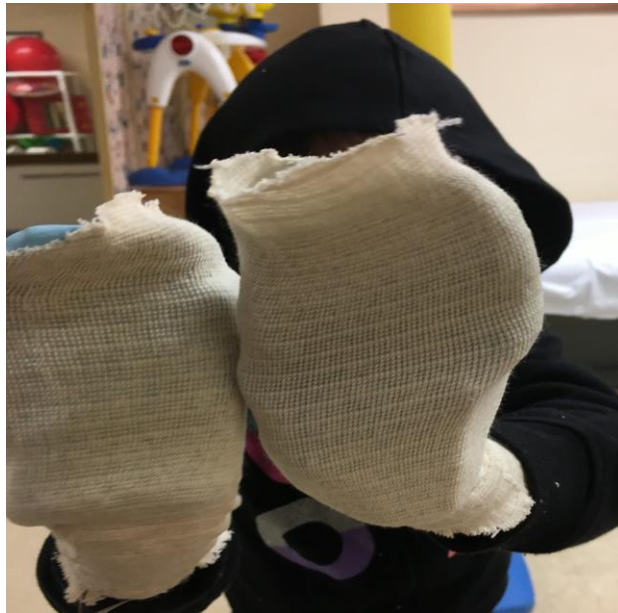

**Figure 5:** Elastomer orthoses secured with compressive sock material

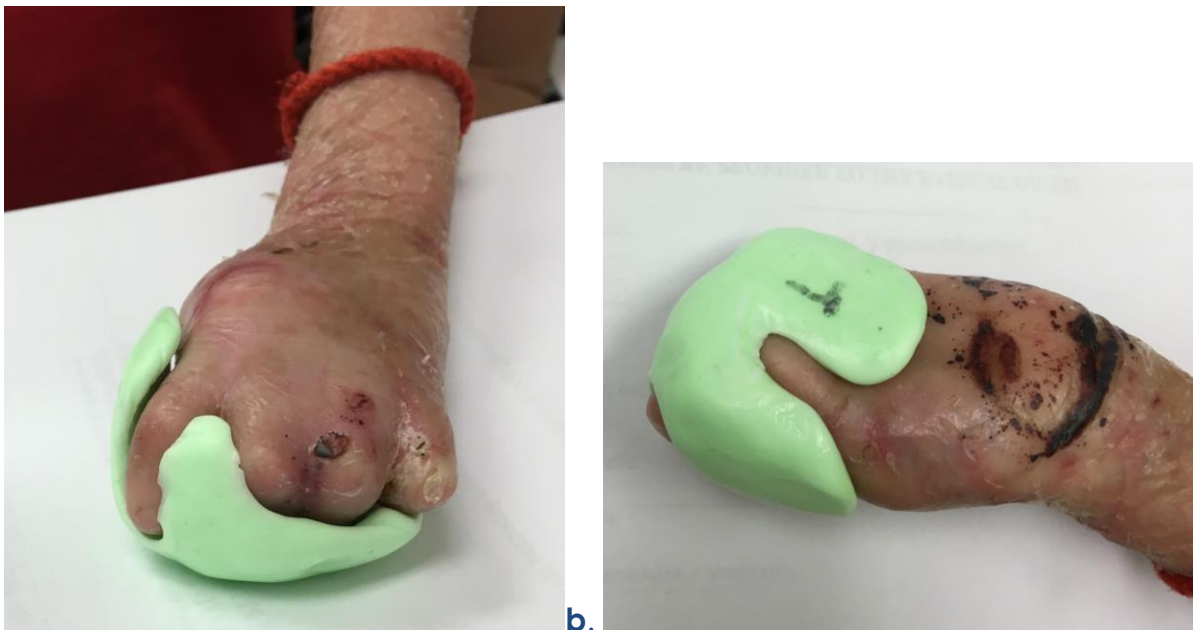

**Figure 6:** Elastomer used for **a.** maintenance of first web space, dorsal view; **b.** maintenance of first web space, palmar view

For additional examples, resources and suggestions, please refer to Occupational Therapy in Epidermolysis Bullosa by Weiß and Prinz (2013).
