# Supplementary material for: Occupational therapy for epidermolysis bullosa: clinical practice guidelines
Source: Orphanet J Rare Dis. 2019 Jun 7;14:129. doi: 10.1186/s13023-019-1059-8 (PMC6556021; doi:10.1186/s13023-019-1059-8)
Supplement: Supplementary file 3 — ADL and IADL Equipment. (PDF 578 kb) [file 13023_2019_1059_MOESM3_ESM.pdf]

## ADL and IADL Equipment

| Product                                                                                                                                                    | Geographical location  | Estimated cost in US \$                                |
|------------------------------------------------------------------------------------------------------------------------------------------------------------|------------------------|--------------------------------------------------------|
| Travel for babies and children                                                                                                                             |                        |                                                        |
| 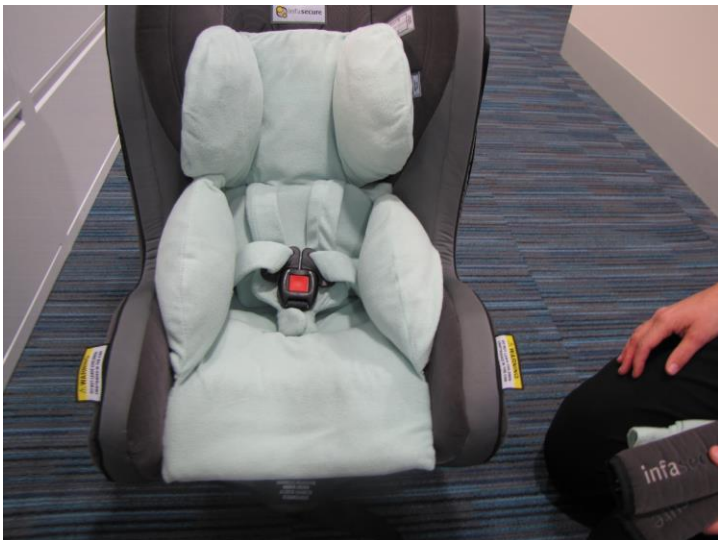                                                                          | Norway, US, Mexico     | 15-27.00 for insert.<br>90-200.00 for padded car seat. |
| <div>DISCLAIMER</div> <div>CHECK MANUFACTURER'S SPECIFICATIONS REGARDING THE ADDITION OF INSERTS AND SAFETY REGULATIONS FOR THE COUNTRY YOU LEAVE IN</div> |                        |                                                        |
| 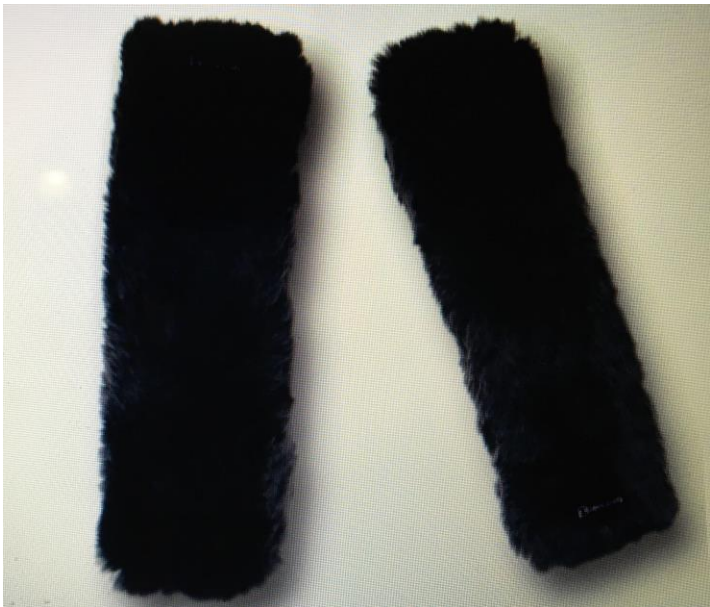                                                                        | Norway, US, and Mexico | 8-13.00                                                |

**Figure 1:** Car seat with plush covering

**Figure 2:** Car seat strap covers

| Product                                                                             | Geographical location | Estimated cost in US \$ |
|-------------------------------------------------------------------------------------|-----------------------|-------------------------|
| <b>Feeding Babies</b>                                                               |                       |                         |
| 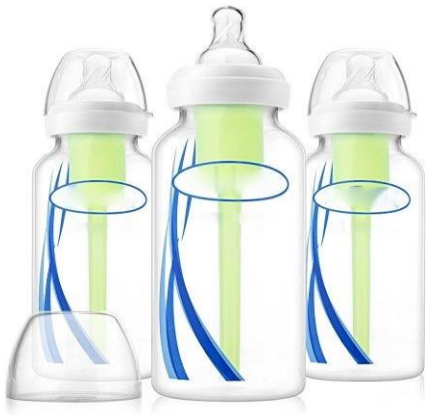   | Norway, US, Mexico    | 16-23.00                |
| 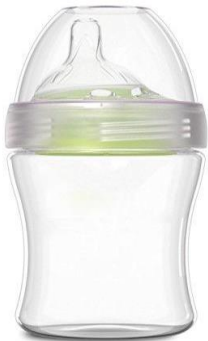  | Norway, US, Mexico    | 17-20.00                |
| 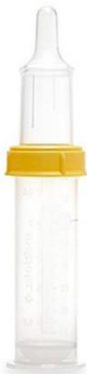 | Norway, US, Mexico    | 23-30.00                |

**Figure 3a:** Baby bottle with controlled flow

**Figure 3b:** Baby bottle with controlled flow

**Figure 3c:** Baby bottle with controlled flow

| Product                                                                                                                                                                                                | Geographical location | Estimated cost in US \$ |
|--------------------------------------------------------------------------------------------------------------------------------------------------------------------------------------------------------|-----------------------|-------------------------|
| <b>Feeding tools</b>                                                                                                                                                                                   |                       |                         |
| 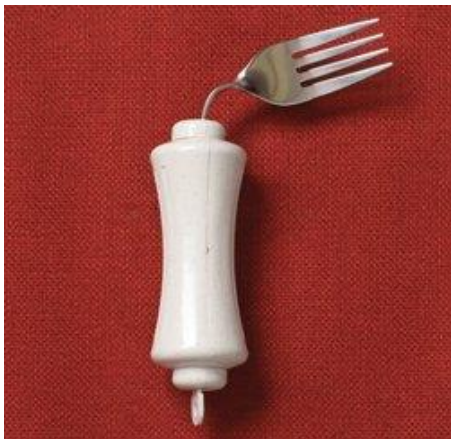 <p><b>Figure 4:</b> Adapted fork with built-up handle and curved to decrease range of motion needed to self-feed</p> | Norway, US, Mexico    | 10-13.00                |
| 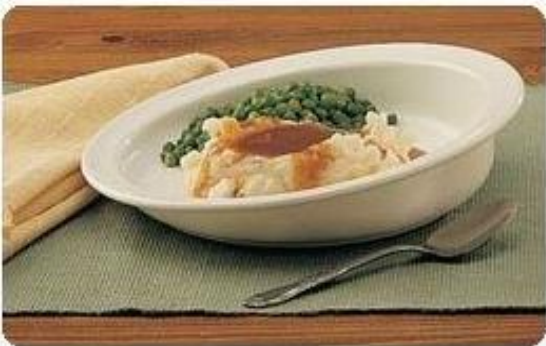 <p><b>Figure 5:</b> Scoop dish</p>                                                                                  | UK, US, Australia     | 8-12.00                 |
| 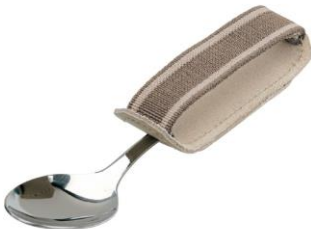 <p><b>Figure 6:</b> Adapted spoon for self-feeding</p>                                                             | Norway, US, Mexico    | 9-21.00                 |

| Product                                                                             | Geographical location  | Estimated cost                                         |
|-------------------------------------------------------------------------------------|------------------------|--------------------------------------------------------|
| <b>Gripping tools</b>                                                               |                        |                                                        |
| 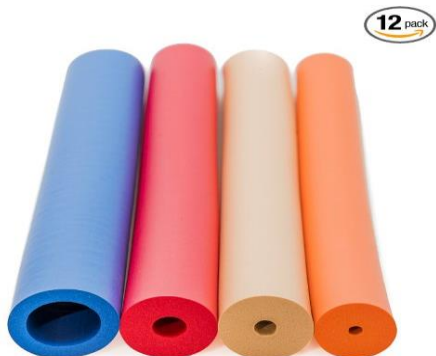   | Norway, US, and Mexico | 10-19.00 for set of 3                                  |
| <p><b>Figure 7a:</b> Foam tubing to adapt handle size for ease of grip</p>          |                        |                                                        |
| 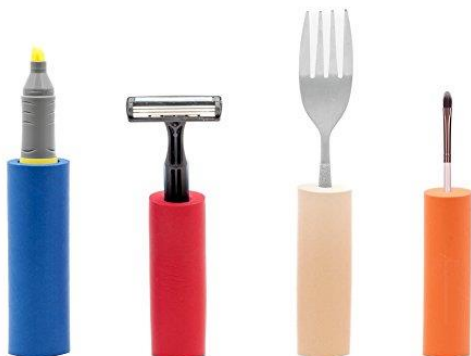  |                        |                                                        |
| <p><b>Figure 7b:</b> Examples of use of foam tubing</p>                             |                        |                                                        |
| 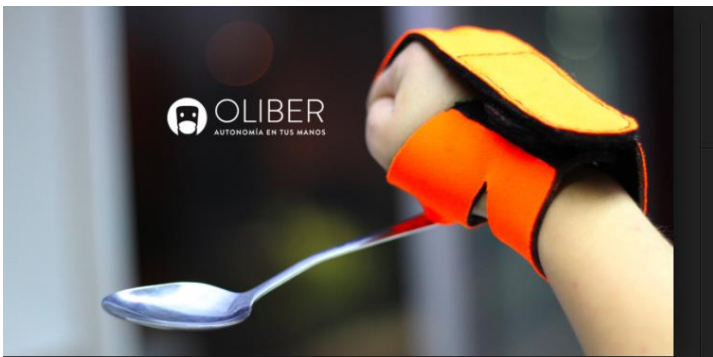 | Chile, USA, UK         | <a href="http://www.myoliber.com">www.myoliber.com</a> |
| <p><b>Figure 8:</b> Oliber magnetic hand orthoses</p>                               |                        |                                                        |

| Product                                                                                                                                    | Geographical location | Estimated cost |
|--------------------------------------------------------------------------------------------------------------------------------------------|-----------------------|----------------|
| <b>Pads and socks</b>                                                                                                                      |                       |                |
| 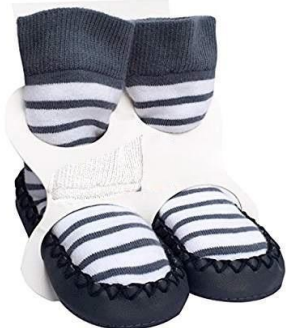 <p><b>Figure 9:</b> Baby slipper socks</p>               | Norway, US, Mexico    | 5-14.00        |
| 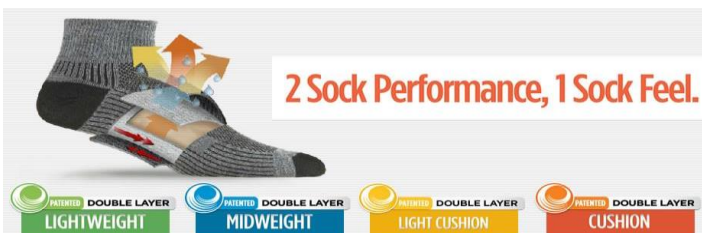 <p><b>Figure 10:</b> Double-layer anti-blister socks</p> | Norway, US, Mexico    | 9-28.00        |
| 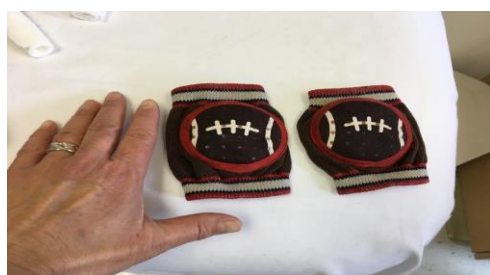 <p><b>Figure 11:</b> Baby-size knee pads</p>           | Norway, US, Mexico    | 9-12.00        |
| 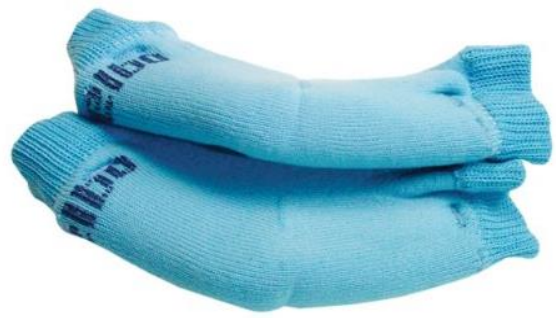 <p><b>Figure 12:</b> Padded elbow sleeves</p>          | Norway, US, Mexico    | 10-14.00       |

| Product                                                                                                                                                                                                                                                                                                                                                                                                                                                                                                                                                                                                                                                                                | Geographical location | Estimated cost |
|----------------------------------------------------------------------------------------------------------------------------------------------------------------------------------------------------------------------------------------------------------------------------------------------------------------------------------------------------------------------------------------------------------------------------------------------------------------------------------------------------------------------------------------------------------------------------------------------------------------------------------------------------------------------------------------|-----------------------|----------------|
| <b>Bath seats and handling aids</b>                                                                                                                                                                                                                                                                                                                                                                                                                                                                                                                                                                                                                                                    |                       |                |
| 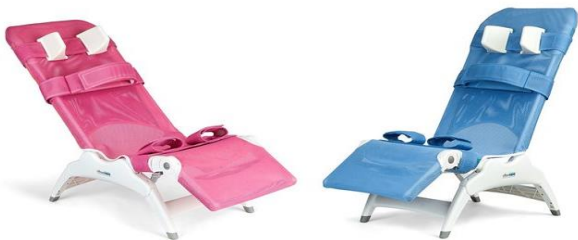                                                                                                                                                                                                                                                                                                                                                                                                                                                                                                                                                                                                      | Norway, US, Mexico    | 140-486.00     |
| <p><b>75416-1002</b></p> <p><b>Doorknob Extender</b></p> <p>Patents Pending</p> <p>Converts any standard door knob into a door lever allowing complete access to keyholes</p> <ul style="list-style-type: none"> <li>• 5" (12.7cm) extension handle provides extra leverage for people with limited hand function</li> <li>• A cord or string can be inserted through the handle slot, making door knobs easier to access for people with limited reach</li> <li>• Can be installed using only a screwdriver - no special tools required</li> <li>• Easy to clean</li> </ul> <p><b>Bag of 2</b></p> 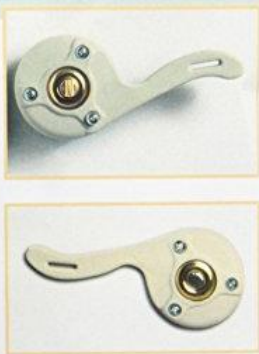 | Norway, US, Mexico    | 12-30.00       |
| 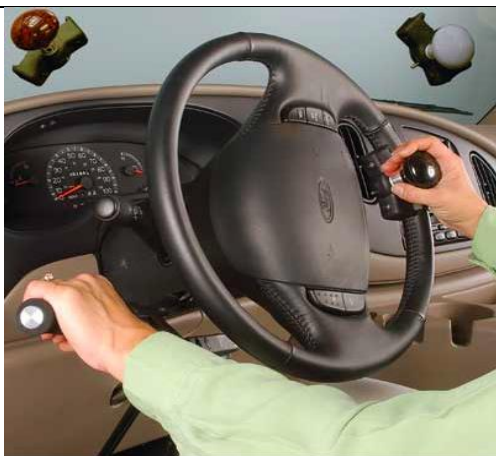                                                                                                                                                                                                                                                                                                                                                                                                                                                                                                                                                                                                    | Norway, US, Mexico    | 9-15.00        |

**Figure 13:** Mesh bath seats

**Figure 14:** Door knob aid

**Figure 15:** Steering wheel aid

| Product                                                                                                                                                                                                                                                                                                                                                                                                      | Geographical location | Estimated cost                                              |
|--------------------------------------------------------------------------------------------------------------------------------------------------------------------------------------------------------------------------------------------------------------------------------------------------------------------------------------------------------------------------------------------------------------|-----------------------|-------------------------------------------------------------|
| 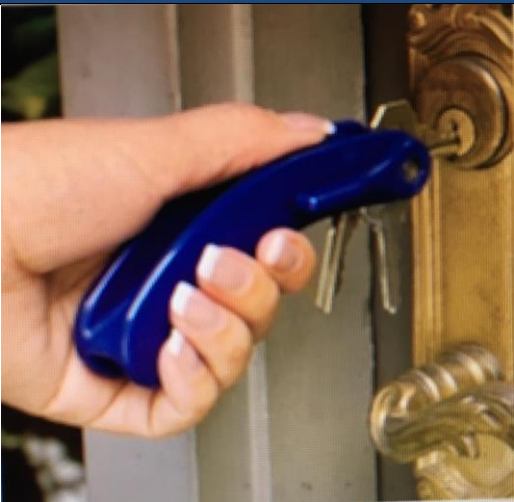 <p><b>Figure 16:</b> Key grip aid</p>                                                                                                                                                                                                                                                                                      | Norway, US, Mexico    | 7-10.00                                                     |
| 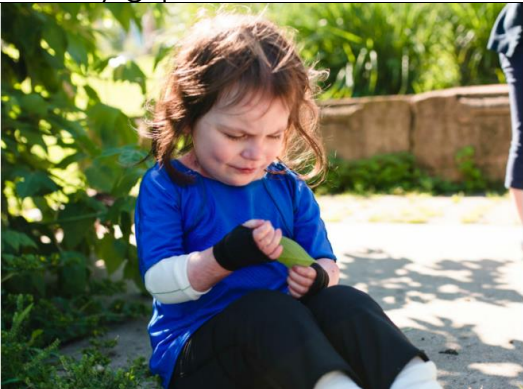 <p><b>Figure 17:</b> Glidewear is a manufacturer of ultra-low-friction fabric used for clothing, blankets, pillow covers and other accessories for persons with EB. It is a two-layer fabric that protects skin by gliding smoothly against itself and absorbing the harmful friction and shear that can damage skin.</p> | US and UK             | <a href="https://glidewear.com/">https://glidewear.com/</a> |

**NOTE:** For more recommendations, aids, and suggestions for ADL and IADL equipment, please refer to Occupational Therapy in Epidermolysis Bullosa by Weiß and Prinz (2013) and the DEBRA International website ([www.debra.org](http://www.debra.org)).
