# Supplementary material for: Occupational therapy for epidermolysis bullosa: clinical practice guidelines
Source: Orphanet J Rare Dis. 2019 Jun 7;14:129. doi: 10.1186/s13023-019-1059-8 (PMC6556021; doi:10.1186/s13023-019-1059-8)
Supplement: Supplementary file 4 — International EB Camps and Activities Directory. (PDF 97 kb) [file 13023_2019_1059_MOESM4_ESM.pdf]

## Occupational Therapy Guideline: Additional file 4

### International EB Camps and Activities Directory

| Host                    | Name of the activity                     | Type of activity                                                                                                                                                                                                                                                                              | Target groups                                    | Location                      | Contact                                                                                                                           |
|-------------------------|------------------------------------------|-----------------------------------------------------------------------------------------------------------------------------------------------------------------------------------------------------------------------------------------------------------------------------------------------|--------------------------------------------------|-------------------------------|-----------------------------------------------------------------------------------------------------------------------------------|
| <b>DEBRA of America</b> |                                          |                                                                                                                                                                                                                                                                                               |                                                  |                               |                                                                                                                                   |
|                         | <b>debra Care Conference</b>             | This is a multi-day event made specifically for EB families and the professional community to access the best information, discover new ideas and connect with other EB families from all over the country<br><b>Different rate packages for EB families, non-EB families, professionals.</b> | EB families and the professional community       | Location changes in USA       | <a href="http://www.debra.org/debra-hosted-events">http://www.debra.org/debra-hosted-events</a>                                   |
| <b>DEBRA Argentina</b>  |                                          |                                                                                                                                                                                                                                                                                               |                                                  |                               |                                                                                                                                   |
|                         | <b>Occupational therapy (OT) service</b> | OT service only at the DEBRA House, not outreach service. In Spanish only                                                                                                                                                                                                                     | All ages and family                              | DEBRA House                   | <a href="http://www.debraargentina.org">www.debraargentina.org</a>                                                                |
| <b>DEBRA Australia</b>  |                                          |                                                                                                                                                                                                                                                                                               |                                                  |                               |                                                                                                                                   |
|                         | <b>Kids Camp and Conference</b>          | Every 2-3 years this is a great opportunity to network with other families and learn all things EB. The children have an amazing time and make lifelong friendships.<br><b>Registration fee has been heavily subsidised by DEBRA</b>                                                          | Families living with EB, and any extended family | Location changes in Australia | <a href="https://www.debra.org.au/family-support/national-eb-camp/">https://www.debra.org.au/family-support/national-eb-camp/</a> |

## Occupational Therapy Guideline: Additional file 4

| Host                 | Name of the activity                         | Type of activity                                                                                                                                                                                                                                                      | Target groups                        | Location                               | Contact                                                                       |
|----------------------|----------------------------------------------|-----------------------------------------------------------------------------------------------------------------------------------------------------------------------------------------------------------------------------------------------------------------------|--------------------------------------|----------------------------------------|-------------------------------------------------------------------------------|
| <b>DEBRA Austria</b> |                                              |                                                                                                                                                                                                                                                                       |                                      |                                        |                                                                               |
| <b>*</b>             | <b>Family weekend</b>                        | Time out of daily life, exchanges of experiences. Main language is German, members also from Italy.<br><b>No fee to attend to members only.</b>                                                                                                                       | All ages and family                  | Location<br>Ainring in<br>Germany      | Sabine Wittmann, DSA<br>Sabine.Wittmann@debra-austria.org<br>0043/1/8764030-0 |
|                      | <b>Annual DEBRA Austria Meeting</b>          | Trainings for people with EB and their relatives; Social program; Exchange of experiences. Main language is German, members also from Italy and Germany.<br><b>DEBRA Austria pays most of the expenses (only the drinks at meals have to be paid by the members).</b> | All ages, members and their families | Salzburg<br>Austria                    | Sabine Wittmann, DSA<br>Sabine.Wittmann@debra-austria.org<br>0043/1/8764030-0 |
| <b>DEBRA Chile</b>   |                                              |                                                                                                                                                                                                                                                                       |                                      |                                        |                                                                               |
|                      | <b>Holiday Break in the national country</b> | A group of thirteen EB patients' families are invited with everything included to a week of holidays in La Laguna beach. 41 people. <b>DEBRA Chile absorb all the costs for members only</b>                                                                          | All ages and their families          | Región de Valparaíso, La Laguna, Chile | Ana María Gonzalez<br>amgonzalez@debrachile.cl<br>+56993386091                |

## Occupational Therapy Guideline: Additional file 4

| Host                     | Name of the activity              | Type of activity                                                                                                                                                    | Target groups                   | Location                                    | Contact                                                                                               |
|--------------------------|-----------------------------------|---------------------------------------------------------------------------------------------------------------------------------------------------------------------|---------------------------------|---------------------------------------------|-------------------------------------------------------------------------------------------------------|
| <b>DEBRA Germany</b>     |                                   |                                                                                                                                                                     |                                 |                                             |                                                                                                       |
|                          | <b>Annual Weekend Families</b>    | Family-feel with workshops and fun events for children                                                                                                              | EB families with young children | Location changes in Germany                 | ieb@ieb-debra.de<br>www.ieb-debra.de                                                                  |
|                          | <b>Annual Weekend for Mothers</b> | Respite for mothers                                                                                                                                                 | Mothers with children with EB   | Location changes in Germany                 | ieb@ieb-debra.de<br>www.ieb-debra.de                                                                  |
| <b>DEBRA New Zealand</b> |                                   |                                                                                                                                                                     |                                 |                                             |                                                                                                       |
| *                        | <b>Adventure/snow camps</b>       | The camps are run approximately every 2 or 3 years, depending on who is interested in organising and how many are interested in attending.                          | People with EB                  | Location changes in New Zealand             | debra@debra.org.nz                                                                                    |
|                          | <b>Family camps</b>               | Emphasis on fun family activities.                                                                                                                                  | EB families with young children | Location changes in New Zealand             | debra@debra.org.nz                                                                                    |
| <b>DEBRA Slovakia</b>    |                                   |                                                                                                                                                                     |                                 |                                             |                                                                                                       |
|                          | <b>Holiday Break Abroad</b>       | Patients and their families go on one week vacation by the sea to heal the wounds and the skin. Not every year depending on who is interested and its members only. | All ages and their families     | 2014 Spain<br>2015 Croatia<br>2016 Bulgaria | http://www.debra-slovakia.org/<br>Kristína Ficeriová<br>kristina.ficeriova@gmail.com<br>+421911793945 |

## Occupational Therapy Guideline: Additional file 4

| Host                  | Name of the activity                     | Type of activity                                                                                                                                                                                                                                                                                | Target groups               | Location                              | Contact                                                             |
|-----------------------|------------------------------------------|-------------------------------------------------------------------------------------------------------------------------------------------------------------------------------------------------------------------------------------------------------------------------------------------------|-----------------------------|---------------------------------------|---------------------------------------------------------------------|
| <b>DEBRA Slovakia</b> |                                          |                                                                                                                                                                                                                                                                                                 |                             |                                       |                                                                     |
|                       | <b>Camp</b>                              | Patients and families meet annually to be informed about the last year's activities, presenting new materials for EB patients, latest information about EB research, sharing experiences. For members only and the organisation absorb the costs of accommodation, catering, meeting activities | All ages and their families | Slovakia<br>Every year somewhere else | Kristína Ficeriová<br>kristina.ficeriova@gmail.com<br>+421911793945 |
| <b>DEBRA Spain</b>    |                                          |                                                                                                                                                                                                                                                                                                 |                             |                                       |                                                                     |
| <b>*</b>              | <b>Annual DEBRA Spain Family Meeting</b> | It includes talks and workshops and activities for people with all types of EB and all ages. Main language is Spanish.<br><b>It is available to anyone. Members of DEBRA Spain have a grant to attend and people from outside must pay their expenses (hotel and meals).</b>                    | All ages and their families | Madrid Spain                          | Evanina de Morcillo Makow<br>info@debra.es<br>00 34 952816434       |

## Occupational Therapy Guideline: Additional file 4

| Host                             | Name of the activity                | Type of activity                                                                 | Target groups               | Location                                   | Contact                                   |
|----------------------------------|-------------------------------------|----------------------------------------------------------------------------------|-----------------------------|--------------------------------------------|-------------------------------------------|
| <b>DEBRA Sweden</b>              |                                     |                                                                                  |                             |                                            |                                           |
|                                  | <b>Camp</b>                         | Camp for all members annually                                                    | All ages and their families | location, activity and time of year varies | www.ebforeningen.se                       |
| <b>DEBRA United Kingdom (UK)</b> |                                     |                                                                                  |                             |                                            |                                           |
|                                  | <b>Annual Overnight Weekend</b>     | Family-feel with workshops and fun events for children                           | All ages                    | Location changes in UK                     | Helen Weaver<br>helen.weaver@debra.org.uk |
|                                  | <b>Supported Weekend City Break</b> | Encourage independent living, peer-support and networking with medical and peers | Adults with severe EB       | Location changes in UK                     | Helen Weaver<br>helen.weaver@debra.org.uk |
|                                  | <b>Four holiday homes</b>           | Holiday homes adapted for use by people with EB                                  | All ages                    | UK                                         | Helen Weaver<br>helen.weaver@debra.org.uk |

**Key:** \* The activity welcomes people from other countries, do check their conditions.

**Others none-DEBRA EB Camps and Activities**

| <b>Host</b>          | <b>Name of the activity</b>                                                     | <b>Type of activity</b>                                                                                                                                                                               | <b>Target groups</b>                               | <b>Location</b>         | <b>Contact</b>                                                                                              |
|----------------------|---------------------------------------------------------------------------------|-------------------------------------------------------------------------------------------------------------------------------------------------------------------------------------------------------|----------------------------------------------------|-------------------------|-------------------------------------------------------------------------------------------------------------|
| <b>Brazil</b>        |                                                                                 |                                                                                                                                                                                                       |                                                    |                         |                                                                                                             |
|                      | <b>Dermacamp</b>                                                                | Camp for children with skin diseases, they have large experience with EB                                                                                                                              | Children with skin diseases                        | São Paulo, Brazil       | <a href="http://dermacamp.org.br">http://dermacamp.org.br</a>                                               |
| <b>United States</b> |                                                                                 |                                                                                                                                                                                                       |                                                    |                         |                                                                                                             |
|                      | <b>SeriousFun Camps</b>                                                         | Host family weekends and week-long kids-only summer camps and typically have medical/nursing staff available for both.                                                                                | Family and kids-only                               | Location changes in USA | <a href="https://www.seriousfunnetwork.org/">https://www.seriousfunnetwork.org/</a>                         |
|                      | <b>The Center for Courageous Kids in Kentucky</b>                               | Similarly to the SeriousFun Camps but is independent of that organization.                                                                                                                            | Family and kids-only                               | Kentucky USA            | <a href="http://www.courageouskids.org/">http://www.courageouskids.org/</a>                                 |
|                      | <b>Camp Discovery</b><br>Program by The American Academy of Dermatology's (AAD) | Under the expert care of dermatologists and nurses, Camp Discovery gives campers the opportunity to spend a week with other young people with skin conditions having fun.<br><b>No fee to attend.</b> | Children ages 8-16 who have a chronic skin disease | Location changes in USA | <a href="https://www.aad.org/public/kids/camp-discovery">https://www.aad.org/public/kids/camp-discovery</a> |

## Occupational Therapy Guideline: Additional file 4

| Host          | Name of the activity                                                      | Type of activity                                                                                                                      | Target groups                                          | Location                | Contact                                                                         |
|---------------|---------------------------------------------------------------------------|---------------------------------------------------------------------------------------------------------------------------------------|--------------------------------------------------------|-------------------------|---------------------------------------------------------------------------------|
| United States | <b>Camp Spirit</b>                                                        | The Colorado Winter Adventure Camp provides opportunity to enjoy winter activities in a safe environment.<br><b>No fee to attend.</b> | Children ages 9-18 with Recessive Dystrophic EB (RDEB) | Colorado USA            | <a href="https://campspiritcolorado.org/">https://campspiritcolorado.org/</a>   |
|               | <b>Camp Wonder</b><br>Program by The Children's Skin Disease Foundation's | This is dedicated to providing a safe and nurturing environment to children with a skin disease.<br><b>No fee to attend.</b>          | children ages 7-16 living with a skin disease          | Location changes in USA | <a href="https://www.csdf.org/camp-wonder">https://www.csdf.org/camp-wonder</a> |

**Key:** \* The activity welcomes people from other countries, do check their conditions.
